# Supplementary material for: Bacteria-supported iron scraps for the removal of nitrate from low carbon-to-nitrogen ratio wastewater
Source: Royal Society of Chemistry journal article supplement (doi:10.1039/c8ra09091b), 2019-01-01
Supplement: c8ra09091b1.pdf [file c8ra09091b1.pdf]

## Bacteria-supported iron scraps for the removal of nitrate from low carbon-to-nitrogen ratio wastewater

Xiawei Liu <sup>a, b</sup>, Jian Xu <sup>a, b</sup>, Jiaolong Huang <sup>a, b</sup>, Manqi Huang <sup>a, b</sup>, Tao Wang <sup>a, b</sup>, Shaopan Bao <sup>a</sup>, Wei Tang <sup>a</sup>, Tao Fang <sup>a, b, \*</sup>

<sup>a</sup> Institute of Hydrobiology, Chinese Academy of Sciences, Wuhan 430072, China

<sup>b</sup> University of Chinese Academy of Sciences, Beijing 100049, China

\* Corresponding author: Institute of Hydrobiology, Chinese Academy of Sciences, 7 Donghu South Road, Wuchang District, Wuhan 430072, China.  
E-mail address: fangt@ihb.ac.cn (T. Fang).

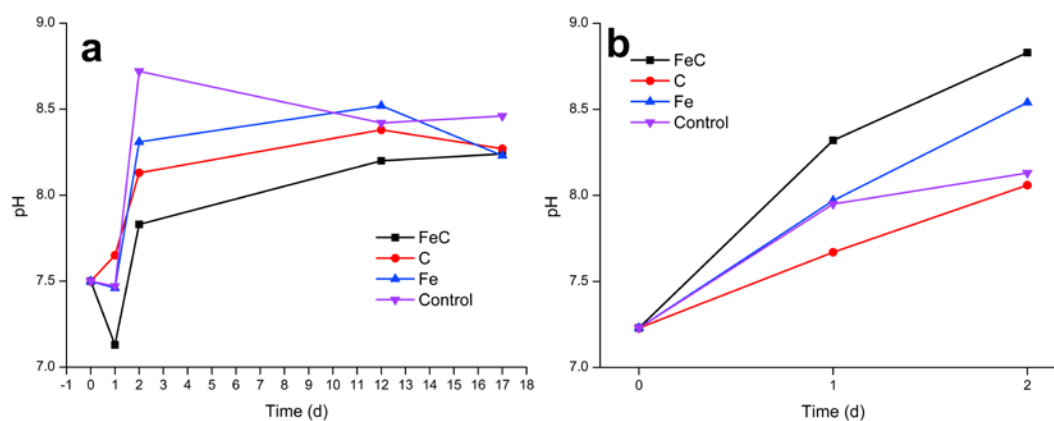

Fig. S1. Variations of pH in four systems (FeC, Fe, C and Control) during the experiment.

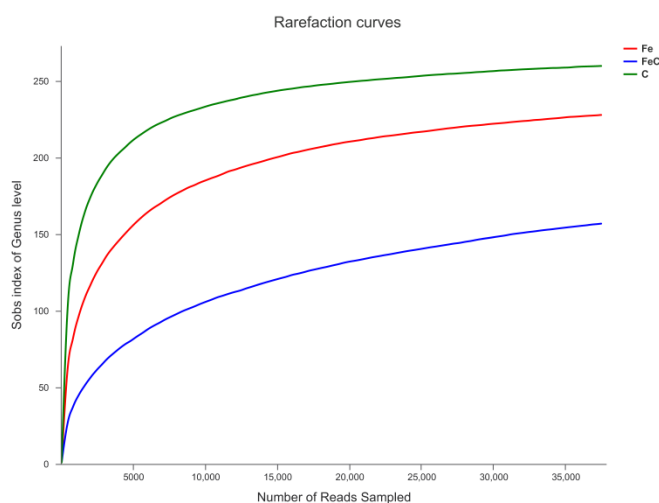

Fig. S2. Rarefaction curves obtained by high-throughput sequencing in different systems (FeC, Fe and C).
